# Supplementary material for: Protein patterning by a DNA origami framework
Source: Royal Society of Chemistry journal article supplement (doi:10.1039/c6nr03199d), 2016-01-01
Supplement: c6nr03199d2.pdf [file c6nr03199d2.pdf]

| tDOF preperation cost                   |                |             |                              |             |
|-----------------------------------------|----------------|-------------|------------------------------|-------------|
|                                         | Stock solution |             | Used for 30 µl of 10 nM tDOF |             |
|                                         | Vol (µl)       | price (DKK) | Vol (µl)                     | price (DKK) |
| M13 (start conc. 100 nM)                | 30             | 350         | 3                            | 35          |
| Each staple strand (stock conc. 100 µM) | 500            | 30          | 0.03                         | 0.0018      |
| Mixture of staple strands (195 strands) |                |             |                              | 0.351       |
| Spin filter                             |                |             | 1                            | 25          |
| Total                                   |                |             | 60.3528                      | ≅ 9.13 USD  |

| tDOF preperation time |  |         |
|-----------------------|--|---------|
|                       |  | minutes |
| Mixing                |  | 15      |
| Self-assembly time    |  | 90      |
| Purification          |  | 45      |
| Total                 |  | 150     |

| Protein patterning time |  |         |
|-------------------------|--|---------|
|                         |  | minutes |
| DNA adsorption          |  | 1       |
| Protein adsorption      |  | ~4      |
| Total                   |  | ~5      |
